# Supplementary material for: Triple-targeted therapy of dabrafenib, trametinib, and osimertinib for the treatment of the acquired BRAF V600E mutation after progression on EGFR-tyrosine kinase inhibitors in advanced EGFR-mutated non-small cell lung cancer patients
Source: PubMed Central journal article supplement — Transl Lung Cancer Res. 2024 Oct 28;13(10):2538–48. doi: 10.21037/tlcr-24-358 (PMC11535828; doi:10.21037/tlcr-24-358), 2024-10-28
Supplement: tlcr-13-10-2538-dss.pdf [file tlcr-13-10-2538-dss.pdf]

## Data Sharing Statement

|                     |                                                                                                                                                     |                                                                                                                                          |
|---------------------|-----------------------------------------------------------------------------------------------------------------------------------------------------|------------------------------------------------------------------------------------------------------------------------------------------|
| <b>Article Info</b> | <a href="https://dx.doi.org/10.21037/tlcr-24-358">https://dx.doi.org/10.21037/tlcr-24-358</a>                                                       |                                                                                                                                          |
| <b>Item</b>         | <b>Question</b>                                                                                                                                     | <b>Authors' Response<br/>(place "-" if not applicable)</b>                                                                               |
| 1                   | Would you like to share data collected for your study to others?                                                                                    | Yes.                                                                                                                                     |
| 2                   | If not, would you like to share the reason for your decision?                                                                                       | -                                                                                                                                        |
| 3                   | What data in particular will be shared?                                                                                                             | The survival data will be shared.                                                                                                        |
| 4                   | Any other documents will be shared? Such as study protocol, statistical analysis plan, informed consent form, clinical study report, analytic code. | No.                                                                                                                                      |
| 5                   | When will data availability begin?                                                                                                                  | From the publication date.                                                                                                               |
| 6                   | When will data availability end?                                                                                                                    | Two years within the publication date.                                                                                                   |
| 7                   | To whom will you share the data?                                                                                                                    | Medical oncologists.                                                                                                                     |
| 8                   | For what type of analysis or purpose?                                                                                                               | For analysis to explore the treatment for lung cancer patients with BRAF V600E mutation.                                                 |
| 9                   | How or where can the data/documents be obtained?                                                                                                    | Emails could be sent to the address below to obtain the shared data:<br><a href="mailto:yangjinji@gdph.org.cn">yangjinji@gdph.org.cn</a> |
| 10                  | Any other restrictions?                                                                                                                             | We may balance the potential benefits and risks for each request and then provide the data that could be shared.                         |
