# Supplementary material for: Triple-targeted therapy of dabrafenib, trametinib, and osimertinib for the treatment of the acquired BRAF V600E mutation after progression on EGFR-tyrosine kinase inhibitors in advanced EGFR-mutated non-small cell lung cancer patients
Source: PubMed Central journal article supplement — Transl Lung Cancer Res. 2024 Oct 28;13(10):2538–48. doi: 10.21037/tlcr-24-358 (PMC11535828; doi:10.21037/tlcr-24-358), 2024-10-28
Supplement: tlcr-13-10-2538-supplementary.pdf [file tlcr-13-10-2538-supplementary.pdf]

**Table S1** Details of drug compounds used in this study and their normalized concentrations

| Compound name | Supplier | Cat. No. | Actual concentration when the normalized concentration is 1 ( $\mu\text{M}$ ) | Maximum concentration for drug test ( $\mu\text{M}$ ) |
|---------------|----------|----------|-------------------------------------------------------------------------------|-------------------------------------------------------|
| Osimertinib   | MCE      | HY-15772 | 2                                                                             | 8                                                     |
| Dabrafenib    | MCE      | HY-14660 | 2                                                                             | 8                                                     |
| Trametinib    | MCE      | HY-10999 | 0.2                                                                           | 0.8                                                   |
| Vemurafenib   | MCE      | HY-12057 | 2                                                                             | 8                                                     |
| Encorafenib   | MCE      | HY-15605 | 2                                                                             | 8                                                     |
| Pemetrexed    | MCE      | HY-10820 | 75                                                                            | 300                                                   |
| Carboplatin   | MCE      | HY-17393 | 12.5                                                                          | 50                                                    |
